# Supplementary material for: Apolipoprotein L2 contains a BH3-like domain but it does not behave as a BH3-only protein
Source: PubMed Central journal article supplement — Cell Death Dis. 2014 Jun 5;5(6):e1275–. doi: 10.1038/cddis.2014.237 (PMC4611713; doi:10.1038/cddis.2014.237), 2014-06-05
Supplement: cddis2014237x1.pdf [file cddis2014237x1.pdf]

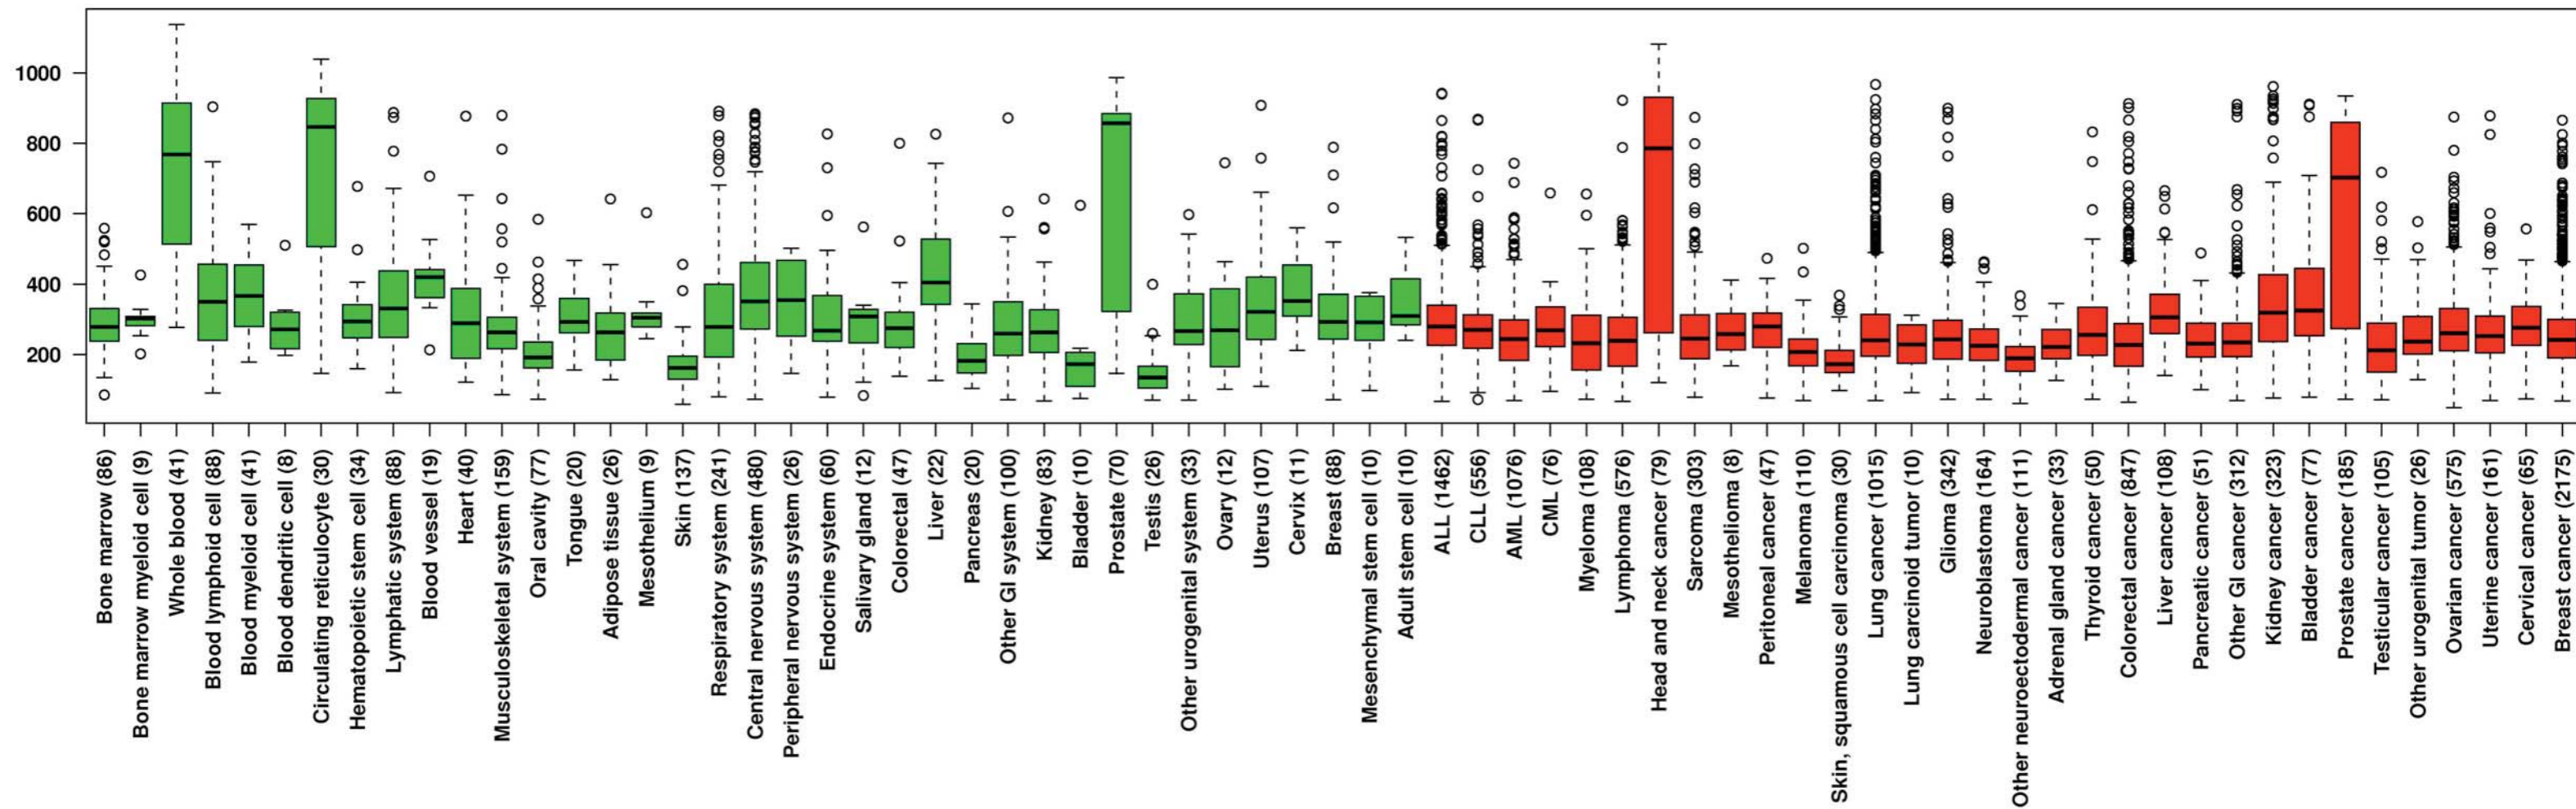

Supplementary Figure 1. ApoL2 expression in healthy and cancer tissues.

Green boxes indicate healthy tissues, red boxes indicate cancers. The bottom of the box is the 25th percentile of the data, the top of the box is the 75th percentile, and the horizontal line is the median. The whiskers extend to 1.5 times the interquartile range from the edges of the box, and any data points beyond this are considered outliers, marked by hollow circles. Data/figure derived from IST Online™ ([ist.medisapiens.com](http://ist.medisapiens.com)).
